# Supplementary material
Source: HighWire-hosted journal article supplement (doi:10.1101/rna.062026.117)
Supplement: Supplemental_Table_S1.xlsx [file Supplemental_Table_S1.xlsx]

## Sheet: Table S1
Supplemental Table 1. Association Rate Constants for Structured RNAs Binding Small Molecule Ligands
RNA (in vitro selected)	Small Molecule Ligand	kon (M-1 s-1)	koff (s-1)	Kd (µM)	[M+]	[M2+]	Buffer	Temperature (oC)	Method	Reference	PMID
Anti-Tobramycin Aptamer	Tobramycin	140000	0.013	0.09	140 mM NaCl, 5 mM KCl	1 mM MgCl2, 1 mM CaCl2	20 mM Tris-HCl (pH 7.4)	25	SPR	Gonzalez-Fernandez et al. (2012)	22967622
Class V Aptamer	GTP	1400000	0.00073	0.00054	200 mM KCl	5 mM MgCl2	10 mM KP (pH 6.2)	RT	Fluorimetry	Elenko et al. (2009)	19572753
Codeine Aptamer (FC5)	Codeine	1630	0.0065	4	250 mM NaCl	5 mM MgCl2	20 mM Tris-HCl (pH 7.4)	RT	SPR	Win et al. (2006)	17038331
FMN Aptamer	FMN	76000	0.084	1.1	150 mM NaCl	5 mM MgCl2	10 mM HEPES (pH 7.4)	25	SPR	Chang et al. (2014)	24548121
Malachite Green Aptamer	Malachite Green	21000	0.02	0.95	150 mM NaCl	5 mM MgCl2	10 mM HEPES (pH 7.4)	25	SPR	Chang et al. (2014)	24548121
Malachite Green Aptamer	Malachite Green	2320000	0.39	0.2	100 mM KCl	5 mM MgCl2	100 mM Tris (pH 9.0)	23	Stopped-Flow Fluorescence	Wang et al. (2009)	19778045
SAH Aptamer	SAH	3000	0.0002	0.0666667	-	50 mM MnCl2	-	RT	SPR	Gebhardt et al. (2000)	10852725
Spinach	DFHBI	81000	0.14	1.3	125 mM KCl	5 mM MgCl2	40 mM HEPES (pH 7.4)	20	Stopped-Flow Fluorescence	Wang et al. (2013)	NA
Spinach	DFHBI	62000	0.024	0.39	125 mM KCl	5 mM MgCl2	40 mM HEPES (pH 7.5)	RT	Fluorimetry	Han et al. (2013)	24286188
Tetracycline Aptamer	Tetracycline	13100000	35	2.7	100 mM NaCl	10 mM MgCl2	20 mM KP (pH 7.5)	RT	Stopped-Flow Fluorescence	Forster et al. (2012)	22053085
Theophylline Aptamer	Theophylline	150000	0.063	0.43	150 mM NaCl	5 mM MgCl2	10 mM HEPES (pH 7.4)	25	SPR	Chang et al. (2014)	24548121
Theophylline Aptamer	Theophylline	170000	0.07	0.41	100 mM NaCl	10 mM MgCl2	50 mM HEPES (pH 7.5)	25	Stopped-Flow Fluorescence	Jucker et al. (2003)	12614150
Theophylline Aptamer	Theophylline	600	1.5	2500	100 mM NaCl	-	25 mM NaP (pH 6.8)	15	NMR Chemical Exchange	Latham et al. (2009)	19317486
RNA (in vitro selected)
N = 13
Average kon = 1.3 x 106 M-1 s-1
Median kon = 8.1 x 104 M-1 s-1
RNA	Small Molecule Ligand	kon (M-1 s-1)	koff (s-1)	Kd (µM)	[M+]	[M2+]	Buffer	Temperature (oC)	Method	Reference	PMID
B. subtilis Adenine Riboswitch (Aptamer Domain)	2AP	263000	0.151	0.574144	100 mM KCl	2 mM MgCl2	50 mM NaMOPS (pH 7.5)	5	Stopped-Flow Fluorescence	Wickiser et al (2005)	16201765
V. vulnificus Adenine Riboswitch	Adenine	37300	0.087282	2.34	100 mM KCl	2 mM MgCl2	50 mM KMOPS (pH 7.5)	20	Stopped-Flow Fluorescence	Rieder et al (2007)	17440909
V. vulnificus Adenine Riboswitch (Aptamer Domain)	Adenine	34700	0.023596	0.68	100 mM KCl	2 mM MgCl2	50 mM KMOPS (pH 7.5)	20	Stopped-Flow Fluorescence	Rieder et al (2007)	17440909
V. cholerae c-di-GMP Riboswitch (Aptamer Domain)	c-di-GMP	16700	1.8e-07	1.1e-05	10 mM KCl	10 mM MgCl2	10 mM NaCac (pH 6.8)	21	Gel Shift Assay	Smith et al (2009)	19898477
V. cholerae c-di-GMP Riboswitch (Aptamer Domain)	c-di-GMP	23000	2.3e-05	0.00098	150 mM NaCl	5 mM MgCl2	10 mM HEPES (pH 7.4)	25	SPR	Chang et al. (2014)	24548121
C. difficile c-di-GMP Riboswitch (Aptamer Domain)	c-di-GMP	160000	0.0096	0.06	150 mM NaCl	5 mM MgCl2	10 mM HEPES (pH 7.4)	25	SPR	Chang et al. (2014)	24548121
B. subtilis FMN Riboswitch	FMN	20600	5.43689	0.112	100 mM KCl	2 mM MgCl2	50 mM MOPS (pH 7.5)	25	Stopped-Flow Fluorescence	Wickiser et al (2005)	15808508
B. subtilis FMN Riboswitch (Aptamer Domain)	FMN	197000	0.0024034	0.0122	100 mM KCl	2 mM MgCl2	50 mM MOPS (pH 7.5)	25	Stopped-Flow Fluorescence	Wickiser et al (2005)	15808508
V. cholerae Glycine Riboswitch (Aptamer Domain)	Glycine	28	0.0056	200	150 mM NaCl	5 mM MgCl2	10 mM HEPES (pH 7.4)	5	SPR	Chang et al. (2014)	24548121
V. cholerae Glycine Riboswitch (Aptamer Domain)	Glycine	720	0.0025	3.5	150 mM NaCl	20 mM MgCl2	10 mM HEPES (pH 7.4)	25	SPR	Chang et al. (2014)	24548121
Azoarcus Group I Ribozyme	Guanosine	2500	0.1325	53	50 mM Na	15 mM MgCl2	50 mM EPPS (pH 8)	30	Single-turnover kinetics	Gletisman and Herschlag (2014)	25246656
T. thermophila Group I Ribozyme	Guanosine	6666.67	0.733334	110	50 mM Na	10 mM MgCl2	50 mM EPPS (pH 8)	30	Single-turnover kinetics	Karbstein and Herschlag (2003)	12591943
env8 HyCbl Riboswitch	HyCbl	1300000	0.02	0.015	100 mM KCl, 25 mM KOH, 10 mM NaOH	1 mM MgCl2	50 mM HEPES (pH 7.7)	20	Stopped-Flow Fluorescence	Holmstrom et al (2014)	25325398
F. nucleatum PreQ1 Riboswitch (61 nt)	PreQ	126000	0.026	0.206349	100 mM KCl	2 mM MgCl2	50 mM KMOPS (pH 7.0)	25	Stopped-Flow Fluorescence	Rieder et al ( 2010)	20534493
F. nucleatum PreQ1 Riboswitch (70 nt)	PreQ	72600	0.019	0.261708	100 mM KCl	2 mM MgCl2	50 mM KMOPS (pH 7.0)	25	Stopped-Flow Fluorescence	Rieder et al ( 2010)	20534493
F. nucleatum PreQ1 Riboswitch (Aptamer Domain)	PreQ	602000	0.17	0.282392	100 mM KCl	2 mM MgCl2	50 mM KMOPS (pH 7.0)	25	Stopped-Flow Fluorescence	Rieder et al ( 2010)	20534493
S. pneumoniae PreQ-II Riboswitch (Aptamer Domain)	PreQ	29000	0.012	0.413793	100 mM KCl	2 mM MgCl2	50 mM KMOPS (pH 7.5)	20	Stopped-Flow Fluorescence	Souliere et al (2013)	23940363
S. pneumoniae PreQ-II Riboswitch (Aptamer Domain, ∆P4)	PreQ	1600000	-	3.4	100 mM KCl	2 mM MgCl2	50 mM KMOPS (pH 7.5)	20	Stopped-Flow Fluorescence	Souliere et al (2013)	23940363
SAM Riboswitch (Aptamer Domain)	SAM	14300	0.002	0.14	100 mM KCl	2 mM MgCl2	50 mM KMOPS (pH 7.5)	20	Stopped-Flow Fluorescence	Haller et al (2011)	21532598
TAR RNA	Neomycin	110	0.00137	12.4	-	-	-	RT	Acoustic Wave Biosensor	Tassew and Thompson (2003)	14556896
B. anthracis TPP Riboswitch (Aptamer Domain)	TPP	150000	0.00021	0.0014	150 mM NaCl	5 mM MgCl2	10 mM HEPES (pH 7.4)	25	SPR	Chang et al. (2014)	24548121
E.coli TPP Riboswitch	TPP	81300	0.034146	0.42	100 mM KCl	2 mM MgCl2	50 mM KMOPS (pH 7.5)	25	Stopped-Flow Fluorescence	Lang et al (2007)	17693433
E.coli TPP Riboswitch (Aptamer Domain)	TPP	142000	0.04615	0.325	100 mM KCl	2 mM MgCl2	50 mM KMOPS (pH 7.5)	25	Stopped-Flow Fluorescence	Lang et al (2007)	17693433
E. coli TPP Riboswitch (Aptamer Domain)	TPP	400000	0.00036	0.00089	150 mM NaCl	5 mM MgCl2	10 mM HEPES (pH 7.4)	25	SPR	Chang et al. (2014)	24548121
RNA
N = 24
Average kon = 2.2 x 105 M-1 s-1
Median kon = 5.5 x 104 M-1 s-1

## Sheet: Table 2
Table 2. Association Rate Constants for Structured RNAs Binding Small Molecule Ligands
RNA	Small Molecule Ligand	kon (M-1 s-1)	koff (s-1)	Kd (µM)	[M+]	[M2+]	Buffer	Temperature (oC)	Method	Reference	PMID
B. subtilis Adenine Riboswitch (Aptamer Domain)	2AP	263000	0.151	0.574144	100 mM KCl	2 mM MgCl2	50 mM NaMOPS (pH 7.5)	5	Stopped-Flow Fluorescence	Wickiser et al (2005)	16201765
V. vulnificus Adenine Riboswitch	Adenine	37300	0.087282	2.34	100 mM KCl	2 mM MgCl2	50 mM KMOPS (pH 7.5)	20	Stopped-Flow Fluorescence	Rieder et al (2007)	17440909
V. vulnificus Adenine Riboswitch (Aptamer Domain)	Adenine	34700	0.023596	0.68	100 mM KCl	2 mM MgCl2	50 mM KMOPS (pH 7.5)	20	Stopped-Flow Fluorescence	Rieder et al (2007)	17440909
V. cholerae c-di-GMP Riboswitch (Aptamer Domain)	c-di-GMP	16700	1.8e-07	1.1e-05	10 mM KCl	10 mM MgCl2	10 mM NaCac (pH 6.8)	21	Gel Shift Assay	Smith et al (2009)	19898477
V. cholerae c-di-GMP Riboswitch (Aptamer Domain)	c-di-GMP	23000	2.3e-05	0.00098	150 mM NaCl	5 mM MgCl2	10 mM HEPES (pH 7.4)	25	SPR	Chang et al. (2014)	24548121
C. difficile c-di-GMP Riboswitch (Aptamer Domain)	c-di-GMP	160000	0.0096	0.06	150 mM NaCl	5 mM MgCl2	10 mM HEPES (pH 7.4)	25	SPR	Chang et al. (2014)	24548121
B. subtilis FMN Riboswitch	FMN	20600	5.43689	0.112	100 mM KCl	2 mM MgCl2	50 mM MOPS (pH 7.5)	25	Stopped-Flow Fluorescence	Wickiser et al (2005)	15808508
B. subtilis FMN Riboswitch (Aptamer Domain)	FMN	197000	0.0024034	0.0122	100 mM KCl	2 mM MgCl2	50 mM MOPS (pH 7.5)	25	Stopped-Flow Fluorescence	Wickiser et al (2005)	15808508
V. cholerae Glycine Riboswitch (Aptamer Domain)	Glycine	28	0.0056	200	150 mM NaCl	5 mM MgCl2	10 mM HEPES (pH 7.4)	5	SPR	Chang et al. (2014)	24548121
V. cholerae Glycine Riboswitch (Aptamer Domain)	Glycine	720	0.0025	3.5	150 mM NaCl	20 mM MgCl2	10 mM HEPES (pH 7.4)	25	SPR	Chang et al. (2014)	24548121
Azoarcus Group I Ribozyme	Guanosine	2500	0.1325	53	50 mM Na	15 mM MgCl2	50 mM EPPS (pH 8)	30	Single-turnover kinetics	Gletisman and Herschlag (2014)	25246656
T. thermophila Group I Ribozyme	Guanosine	6666.67	0.733334	110	50 mM Na	10 mM MgCl2	50 mM EPPS (pH 8)	30	Single-turnover kinetics	Karbstein and Herschlag (2003)	12591943
env8 HyCbl Riboswitch	HyCbl	1300000	0.02	0.015	100 mM KCl, 25 mM KOH, 10 mM NaOH	1 mM MgCl2	50 mM HEPES (pH 7.7)	20	Stopped-Flow Fluorescence	Holmstrom et al (2014)	25325398
F. nucleatum PreQ1 Riboswitch (61 nt)	PreQ	126000	0.026	0.206349	100 mM KCl	2 mM MgCl2	50 mM KMOPS (pH 7.0)	25	Stopped-Flow Fluorescence	Rieder et al ( 2010)	20534493
F. nucleatum PreQ1 Riboswitch (70 nt)	PreQ	72600	0.019	0.261708	100 mM KCl	2 mM MgCl2	50 mM KMOPS (pH 7.0)	25	Stopped-Flow Fluorescence	Rieder et al ( 2010)	20534493
F. nucleatum PreQ1 Riboswitch (Aptamer Domain)	PreQ	602000	0.17	0.282392	100 mM KCl	2 mM MgCl2	50 mM KMOPS (pH 7.0)	25	Stopped-Flow Fluorescence	Rieder et al ( 2010)	20534493
S. pneumoniae PreQ-II Riboswitch (Aptamer Domain)	PreQ	29000	0.012	0.413793	100 mM KCl	2 mM MgCl2	50 mM KMOPS (pH 7.5)	20	Stopped-Flow Fluorescence	Souliere et al (2013)	23940363
S. pneumoniae PreQ-II Riboswitch (Aptamer Domain, ∆P4)	PreQ	1600000	-	3.4	100 mM KCl	2 mM MgCl2	50 mM KMOPS (pH 7.5)	20	Stopped-Flow Fluorescence	Souliere et al (2013)	23940363
SAM Riboswitch (Aptamer Domain)	SAM	14300	0.002	0.14	100 mM KCl	2 mM MgCl2	50 mM KMOPS (pH 7.5)	20	Stopped-Flow Fluorescence	Haller et al (2011)	21532598
TAR RNA	Neomycin	110	0.00137	12.4	-	-	-	RT	Acoustic Wave Biosensor	Tassew and Thompson (2003)	14556896
B. anthracis TPP Riboswitch (Aptamer Domain)	TPP	150000	0.00021	0.0014	150 mM NaCl	5 mM MgCl2	10 mM HEPES (pH 7.4)	25	SPR	Chang et al. (2014)	24548121
E.coli TPP Riboswitch	TPP	81300	0.034146	0.42	100 mM KCl	2 mM MgCl2	50 mM KMOPS (pH 7.5)	25	Stopped-Flow Fluorescence	Lang et al (2007)	17693433
E.coli TPP Riboswitch (Aptamer Domain)	TPP	142000	0.04615	0.325	100 mM KCl	2 mM MgCl2	50 mM KMOPS (pH 7.5)	25	Stopped-Flow Fluorescence	Lang et al (2007)	17693433
E. coli TPP Riboswitch (Aptamer Domain)	TPP	400000	0.00036	0.00089	150 mM NaCl	5 mM MgCl2	10 mM HEPES (pH 7.4)	25	SPR	Chang et al. (2014)	24548121

## Sheet: Table of Abbreviations
Table of Abbreviations
2AP	2-Aminopurine
4-DABCYL	4-((4-(dimethylamino)phenyl)azo)benzoic Acid
6-FAM	6-Carboxyfluorescein
c-di-GMP	Bis-(3'-5')-cyclic dimeric guanosine monophosphate
CoA	Coenzyme A
DFHBI	(5Z)-5-[(3,5-Difluoro-4-hydroxyphenyl)methylene]-3,5-dihydro-2,3-dimethyl- 4H-Imidazol-4-one, (Z)-4-(3,5-Difluoro-4-hydroxybenzylidene)-1,2-dimethyl-1H-imidazol-5(4H)-one
DNP	2,4-dinitrophenol
dsRNA	double-stranded RNA
EDTA	Ethylenediaminetetraacetic acid
EPPS	4-(2-Hydroxyethyl)-1-piperazinepropanesulfonic acid
FMN	Flavin mononucleotide
FRET	Fluorescence resonance energy transfer
GTP	Guanosine triphosphate
HEPES	4-(2-hydroxyethyl)-1-piperazineethanesulfonic acid)
HyCbl	Hydroxocobalamin
ITC	Isothermal titration calorimetry
KMOPS	Potassium (3-(N-morpholino)propanesulfonic acid)
KP	Potassium phosphate
MES	2-Ethanesulfonic acid
MOPS	(3-(N-morpholino)propanesulfonic acid)
NaCac	Sodium cacodylate
NAD	Nicotinamide adenine dinucleotide, oxidized
NADH	Nicotinamide adenine dinucleotide, reduced
NaP	Sodium phosphate
NMR	Nuclear magnetic resonance
OAc	Acetate
PIPES	Piperazine-N,N′-bis(2-ethanesulfonic acid)
PreQ	Pre-queuosine
RT	Room temperature (20 - 22 °C)
SAH	S-Adenosyl-L-homocysteine
SAM	S-Adenosyl methionine
smFRET	single-molecule fluorescence resonance energy transfer
SPR	Surface plasmon resonance
ssRNA	single-stranded RNA
TPP	Thiamine pyrophosphate
Tris	Tris(hydroxymethyl)aminomethane
