# Supplementary material
Source: HighWire-hosted journal article supplement (doi:10.1101/rna.062026.117)
Supplement: Supplemental_Table_S2.xlsx [file Supplemental_Table_S2.xlsx]

## Sheet: Table 2
Table 2. Association Rate Constants for Structured RNAs Binding Small Molecule Ligands
RNA	Small Molecule Ligand	kon (M-1 s-1)	koff (s-1)	Kd (µM)	[M+]	[M2+]	Buffer	Temperature (oC)	Method	Reference	PMID
B. subtilis Adenine Riboswitch (Aptamer Domain)	2AP	263000	0.151	0.574144	100 mM KCl	2 mM MgCl2	50 mM NaMOPS (pH 7.5)	5	Stopped-Flow Fluorescence	Wickiser et al (2005)	16201765
V. vulnificus Adenine Riboswitch	Adenine	37300	0.087282	2.34	100 mM KCl	2 mM MgCl2	50 mM KMOPS (pH 7.5)	20	Stopped-Flow Fluorescence	Rieder et al (2007)	17440909
V. vulnificus Adenine Riboswitch (Aptamer Domain)	Adenine	34700	0.023596	0.68	100 mM KCl	2 mM MgCl2	50 mM KMOPS (pH 7.5)	20	Stopped-Flow Fluorescence	Rieder et al (2007)	17440909
V. cholerae c-di-GMP Riboswitch (Aptamer Domain)	c-di-GMP	16700	1.8e-07	1.1e-05	10 mM KCl	10 mM MgCl2	10 mM NaCac (pH 6.8)	21	Gel Shift Assay	Smith et al (2009)	19898477
V. cholerae c-di-GMP Riboswitch (Aptamer Domain)	c-di-GMP	23000	2.3e-05	0.00098	150 mM NaCl	5 mM MgCl2	10 mM HEPES (pH 7.4)	25	SPR	Chang et al. (2014)	24548121
C. difficile c-di-GMP Riboswitch (Aptamer Domain)	c-di-GMP	160000	0.0096	0.06	150 mM NaCl	5 mM MgCl2	10 mM HEPES (pH 7.4)	25	SPR	Chang et al. (2014)	24548121
B. subtilis FMN Riboswitch	FMN	20600	5.43689	0.112	100 mM KCl	2 mM MgCl2	50 mM MOPS (pH 7.5)	25	Stopped-Flow Fluorescence	Wickiser et al (2005)	15808508
B. subtilis FMN Riboswitch (Aptamer Domain)	FMN	197000	0.0024034	0.0122	100 mM KCl	2 mM MgCl2	50 mM MOPS (pH 7.5)	25	Stopped-Flow Fluorescence	Wickiser et al (2005)	15808508
V. cholerae Glycine Riboswitch (Aptamer Domain)	Glycine	28	0.0056	200	150 mM NaCl	5 mM MgCl2	10 mM HEPES (pH 7.4)	5	SPR	Chang et al. (2014)	24548121
V. cholerae Glycine Riboswitch (Aptamer Domain)	Glycine	720	0.0025	3.5	150 mM NaCl	20 mM MgCl2	10 mM HEPES (pH 7.4)	25	SPR	Chang et al. (2014)	24548121
Azoarcus Group I Ribozyme	Guanosine	2500	0.1325	53	50 mM Na	15 mM MgCl2	50 mM EPPS (pH 8)	30	Single-turnover kinetics	Gletisman and Herschlag (2014)	25246656
T. thermophila Group I Ribozyme	Guanosine	6666.67	0.733334	110	50 mM Na	10 mM MgCl2	50 mM EPPS (pH 8)	30	Single-turnover kinetics	Karbstein and Herschlag (2003)	12591943
env8 HyCbl Riboswitch	HyCbl	1300000	0.02	0.015	100 mM KCl, 25 mM KOH, 10 mM NaOH	1 mM MgCl2	50 mM HEPES (pH 7.7)	20	Stopped-Flow Fluorescence	Holmstrom et al (2014)	25325398
F. nucleatum PreQ1 Riboswitch (61 nt)	PreQ	126000	0.026	0.206349	100 mM KCl	2 mM MgCl2	50 mM KMOPS (pH 7.0)	25	Stopped-Flow Fluorescence	Rieder et al ( 2010)	20534493
F. nucleatum PreQ1 Riboswitch (70 nt)	PreQ	72600	0.019	0.261708	100 mM KCl	2 mM MgCl2	50 mM KMOPS (pH 7.0)	25	Stopped-Flow Fluorescence	Rieder et al ( 2010)	20534493
F. nucleatum PreQ1 Riboswitch (Aptamer Domain)	PreQ	602000	0.17	0.282392	100 mM KCl	2 mM MgCl2	50 mM KMOPS (pH 7.0)	25	Stopped-Flow Fluorescence	Rieder et al ( 2010)	20534493
S. pneumoniae PreQ-II Riboswitch (Aptamer Domain)	PreQ	29000	0.012	0.413793	100 mM KCl	2 mM MgCl2	50 mM KMOPS (pH 7.5)	20	Stopped-Flow Fluorescence	Souliere et al (2013)	23940363
S. pneumoniae PreQ-II Riboswitch (Aptamer Domain, ∆P4)	PreQ	1600000	-	3.4	100 mM KCl	2 mM MgCl2	50 mM KMOPS (pH 7.5)	20	Stopped-Flow Fluorescence	Souliere et al (2013)	23940363
SAM Riboswitch (Aptamer Domain)	SAM	14300	0.002	0.14	100 mM KCl	2 mM MgCl2	50 mM KMOPS (pH 7.5)	20	Stopped-Flow Fluorescence	Haller et al (2011)	21532598
TAR RNA	Neomycin	110	0.00137	12.4	-	-	-	RT	Acoustic Wave Biosensor	Tassew and Thompson (2003)	14556896
B. anthracis TPP Riboswitch (Aptamer Domain)	TPP	150000	0.00021	0.0014	150 mM NaCl	5 mM MgCl2	10 mM HEPES (pH 7.4)	25	SPR	Chang et al. (2014)	24548121
E.coli TPP Riboswitch	TPP	81300	0.034146	0.42	100 mM KCl	2 mM MgCl2	50 mM KMOPS (pH 7.5)	25	Stopped-Flow Fluorescence	Lang et al (2007)	17693433
E.coli TPP Riboswitch (Aptamer Domain)	TPP	142000	0.04615	0.325	100 mM KCl	2 mM MgCl2	50 mM KMOPS (pH 7.5)	25	Stopped-Flow Fluorescence	Lang et al (2007)	17693433
E. coli TPP Riboswitch (Aptamer Domain)	TPP	400000	0.00036	0.00089	150 mM NaCl	5 mM MgCl2	10 mM HEPES (pH 7.4)	25	SPR	Chang et al. (2014)	24548121

## Sheet: Table S2 
Supplemental Table 2. Association Rate Constants for Structured RNAs Binding RNAs
RNA	RNA Ligand	kon (M-1 s-1)	koff (s-1)	Kd (µM)	[M+]	[M2+]	Buffer	Temperature (oC)	Method	Interaction	Reference	PMID
Azoarcus Ribozyme (L-9)	Substrate (ssRNA, 8 nt)	533333	4.33e-06	8.12e-06	50 mM Na	15 mM MgCl2	50 mM NaMES (pH 6.2)	30	Single-turnover kinetics, pulse-chase	BP	Gleitsman and Herschlag (2014)	25246656
Azoarcus Ribozyme, ΔP1P2	P1P2	3330	-	-	50 mM Na	15 mM MgCl2	50 mM NaMES (pH 6.2)	30	Gel shift kinetic assay	3°	K.R. Gleitsman and D. Herschlag, unpubl.	-
B. subtilis RNase P (RNA subunit)	pre-tRNAAsp, 5 nt leader sequence	6300000	0.65	0.103175	800 mM NH4Cl	100 mM MgCl2	50 mM Tris (pH 8.0)	37	Single-turnover kinetics, pulse-chase	BP + 3°	Beebe and Fierke (1994)	7520753
CopT	CopA	920000	0.0077	0.00836957	100 mM NaCl	10 mM MgOAc	20 mM Tris-acetate (pH 7.6)	-	SPR	BP (Kissing Loop)	Nordgren et al (2001)	11502000
Dimer Linkage Structure (DLS)	Dimerization Initiation Site (DIS) of HIV-1	62500	-	0.021	300 mM KCl	5 mM MgCl2	50 mM Na Cac (pH 7.5)	37	32P Gel Shift Assay	BP (Kissing Loop)	Paillart et al (1997)	9231899
Dual Tetraloop	Dual Receptor	5800	0.00068	0.117	-	1 mM MgCl2	20 mM HEPES (pH 7.0)	30	ITC	3°	Vander Meulen et al (2011)	22058128
Hammerhead Ribozyme (HH16)	Substrate (ssRNA, 18 nt)	300000	2.5e-12	8.33e-12	-	10 mM MgCl2	50 mM Tris (pH 7.5)	25	Single-turnover kinetics, pulse-chase	BP	Hertel et al (1994)	8136375
HDV Ribozyme (Antigenomic, ADC1)	Substrate (ssRNA, 10 nt)	350000	0.023	0.066	-	10 mM MgCl2	40 mM Tris-HCl (pH 8.0)	37	Single-turnover kinetics, pulse-chase	BP	Shih and Been (2000)	10924098
HIV TAR RNA Hairpin	RNA Aptamer Loop R06	92000	0.00029	0.00315217	20 mM NaCl, 140 mM KCl	3 mM MgCl2	10 mM NaP (pH 7.2)	23	SPR	BP (Kissing Loop)	Lebars et al (2008)	18996893
HIV TAR RNA Hairpin	HIV TAR RNA Hairpin	210000	0.000655	0.00311905	100 mM NaCl	10 mM MgCl2	100 mM Tris–HEPES (pH 7.8), 0.1 mM EDTA	4	SPR	BP (Kissing Loop)	Nair et al (2000)	10756194
Kissing Loop	Kissing Loop	3400000	0.17	0.05	-	10 mM MgCl2	50 mM Tris-HCl (pH 7.5)	RT	smFRET	BP (Kissing Loop)	Salim et al (2012)	22404932
Loop A Hairpin Ribozyme	Loop B Hairpin Ribozyme	1970	0.00071	0.373	20 µM NaCl	250 uM Co-Hex	HEPES (pH 7.5)	30	SPR	3°	Sumita et al (2013)	23324606
OxyS Antisense	fhIA mRNA	500000	-	-	60 mM KCl	10 mM MgCl2	10 mM Tris-HCl (pH 8.0), 1 mM DTT	22	Gel shift kinetic assay	BP (Kissing Loop)	Argaman and Altuvia (2000)	10903857
PNK Ribozyme	Substrate (ssRNA, 7nt)	20000	0.042	2	400 mM KCl	50 mM MgCl2	PIPES (pH 7.0)	RT	Single-turnover kinetics, pulse-chase	BP	Lorsch and Szostak (1995)	7578148
R0624 RNA	Mini-TAR BRU	39000	0.00026	0.0069	20 mM NaOAc, 140 mM KOAc	3 mM MgOAc	20 mM HEPES (pH 7.3)	23	SPR	BP (Kissing Loop)	Darfeuille et al (2002)	12105271
R1inv (ColE Antisense)	R2inv (Target)	130000	8.9e-05	0.000684615	25 mM NaCl	5 mM MgCl2	1 mM Cac (pH 6.5)	25	Stopped-flow fluorescence kinetics	BP (Kissing Loop)	Rist and Marino (2001)	11376159
RNA Ligase (b1-207)	Substrate (ssRNA, 32 nt)	1200000	0.17	0.14	200 KCl	60 mM MgCl2	50 mM EPPS (pH 8.0), 600 µM EDTA	22	Steady-state kinetics, pulse-chase	BP	Bergman et al (2000)	10715133
RNAIII	coa mRNA	110000	-	-	150 mM NaOAc	10 mM MgOAc	20 mM Tris-acetate (pH 7.5)	37	Gel shift kinetic assay	BP (Kissing Loop)	Chevalier et al (2010)	20300607
Sok Antisense RNA	Hok RNA	2100000	-	-	100 mM NaCl	10 mM MgCl2	20 mM Tris-HCl (pH 7.8)	37	Single-turnover kinetics	BP (Kissing Loop)	Franch et al (1999)	10600370
Tetraloop (GAAA)	Tetraloop Receptor (11 nt AC, natural variant)	1742.05	-	-	100 mM KCl	1 mM MgCl2	50 mM KMOPS (pH 8), 10 µM EDTA	25	smFRET	3°	S. Bonilla and D. Herschlag, unpubl.	-
Tetraloop (GAAA)	in vitro selected tetraloop receptor (C7.2)	914.915	-	-	100 mM KCl	1 mM MgCl2	50 mM KMOPS (pH 8), 10 µM EDTA	25	smFRET	3°	S. Bonilla and D. Herschlag, unpubl.	-
Tetraloop (GAAA)	in vitro selected tetraloop receptor (C7.10)	820.914	-	-	100 mM KCl	1 mM MgCl2	50 mM KMOPS (pH 8), 10 µM EDTA	25	smFRET	3°	S. Bonilla and D. Herschlag, unpubl.	-
Tetrahymena Ribozyme (L-21)	5'-splice site analogue (ssRNA, 7 nt)	1.33333e+06	0.00045	0.00034	50 mM Na	10 mM MgCl2	50 mM NaMES (pH 6.2)	30	Single-turnover kinetics, pulse-chase	BP	Karbstein et al (2002)	12220182
Tetrahymena Ribozyme (L-16)	3'-splice site analogue (ssRNA, 6 nt)	5000000	0.03	0.006	50 mM Na	10 mM MgCl2	50 mM NaMOPS (pH 7.7)	4	Single-turnover kinetics, pulse-chase	BP + 3°	Karbstein and Herschlag (2003)	12591943
Tetrahymena Ribozyme, ΔP5abc	P5abc	250000	1.83333e-08	7.33333e-08	50 mM Na	10 mM MgCl2	50 mM NaMOPS (pH 7.0)	25	Gel shift kinetic assay	BP (Kissing Loop)	Johnson et al. (2005)	1177367
Tetrahymena Ribozyme, ΔP5abc	P5abc (U167C)	3670	-	-	50 mM Na	10 mM MgCl2	50 mM NaMOPS (pH 7.0)	25	Gel shift kinetic assay	3°	Gracia et al. (2016)	27452365
Yeast tRNAPhe	E.coli tRNAGlu	3200000	8.9	2.78125	100 mM Na2SO4	10 mM MgSO4	10 mM Cac (pH 7)	25.6	Temperature-jump kinetics	BP	Grosjean et al (1976)	781277
BP
N = 18
Average kon = 8.2 x 105 M-1 s-1
Median kon = 3.3 x 105 M-1 s-1
3° and (BP + 3°):
N = 9
Average kon = 1.3 x 106 M-1 s-1
Median kon = 3.3 x 103 M-1 s-1

## Sheet: Table of Abbreviations
Table of Abbreviations
2AP	2-Aminopurine
4-DABCYL	4-((4-(dimethylamino)phenyl)azo)benzoic Acid
6-FAM	6-Carboxyfluorescein
c-di-GMP	Bis-(3'-5')-cyclic dimeric guanosine monophosphate
CoA	Coenzyme A
DFHBI	(5Z)-5-[(3,5-Difluoro-4-hydroxyphenyl)methylene]-3,5-dihydro-2,3-dimethyl- 4H-Imidazol-4-one, (Z)-4-(3,5-Difluoro-4-hydroxybenzylidene)-1,2-dimethyl-1H-imidazol-5(4H)-one
DNP	2,4-dinitrophenol
dsRNA	double-stranded RNA
EDTA	Ethylenediaminetetraacetic acid
EPPS	4-(2-Hydroxyethyl)-1-piperazinepropanesulfonic acid
FMN	Flavin mononucleotide
FRET	Fluorescence resonance energy transfer
GTP	Guanosine triphosphate
HEPES	4-(2-hydroxyethyl)-1-piperazineethanesulfonic acid)
HyCbl	Hydroxocobalamin
ITC	Isothermal titration calorimetry
KMOPS	Potassium (3-(N-morpholino)propanesulfonic acid)
KP	Potassium phosphate
MES	2-Ethanesulfonic acid
MOPS	(3-(N-morpholino)propanesulfonic acid)
NaCac	Sodium cacodylate
NAD	Nicotinamide adenine dinucleotide, oxidized
NADH	Nicotinamide adenine dinucleotide, reduced
NaP	Sodium phosphate
NMR	Nuclear magnetic resonance
OAc	Acetate
PIPES	Piperazine-N,N′-bis(2-ethanesulfonic acid)
PreQ	Pre-queuosine
RT	Room temperature (20 - 22 °C)
SAH	S-Adenosyl-L-homocysteine
SAM	S-Adenosyl methionine
smFRET	single-molecule fluorescence resonance energy transfer
SPR	Surface plasmon resonance
ssRNA	single-stranded RNA
TPP	Thiamine pyrophosphate
Tris	Tris(hydroxymethyl)aminomethane
