# Supplementary material
Source: HighWire-hosted journal article supplement (doi:10.1101/rna.062026.117)
Supplement: Supplemental_Table_S3.xlsx [file Supplemental_Table_S3.xlsx]

## Sheet: Table 2
Table 2. Association Rate Constants for Structured RNAs Binding Small Molecule Ligands
RNA	Small Molecule Ligand	kon (M-1 s-1)	koff (s-1)	Kd (µM)	[M+]	[M2+]	Buffer	Temperature (oC)	Method	Reference	PMID
B. subtilis Adenine Riboswitch (Aptamer Domain)	2AP	263000	0.151	0.574144	100 mM KCl	2 mM MgCl2	50 mM NaMOPS (pH 7.5)	5	Stopped-Flow Fluorescence	Wickiser et al (2005)	16201765
V. vulnificus Adenine Riboswitch	Adenine	37300	0.087282	2.34	100 mM KCl	2 mM MgCl2	50 mM KMOPS (pH 7.5)	20	Stopped-Flow Fluorescence	Rieder et al (2007)	17440909
V. vulnificus Adenine Riboswitch (Aptamer Domain)	Adenine	34700	0.023596	0.68	100 mM KCl	2 mM MgCl2	50 mM KMOPS (pH 7.5)	20	Stopped-Flow Fluorescence	Rieder et al (2007)	17440909
V. cholerae c-di-GMP Riboswitch (Aptamer Domain)	c-di-GMP	16700	1.8e-07	1.1e-05	10 mM KCl	10 mM MgCl2	10 mM NaCac (pH 6.8)	21	Gel Shift Assay	Smith et al (2009)	19898477
V. cholerae c-di-GMP Riboswitch (Aptamer Domain)	c-di-GMP	23000	2.3e-05	0.00098	150 mM NaCl	5 mM MgCl2	10 mM HEPES (pH 7.4)	25	SPR	Chang et al. (2014)	24548121
C. difficile c-di-GMP Riboswitch (Aptamer Domain)	c-di-GMP	160000	0.0096	0.06	150 mM NaCl	5 mM MgCl2	10 mM HEPES (pH 7.4)	25	SPR	Chang et al. (2014)	24548121
B. subtilis FMN Riboswitch	FMN	20600	5.43689	0.112	100 mM KCl	2 mM MgCl2	50 mM MOPS (pH 7.5)	25	Stopped-Flow Fluorescence	Wickiser et al (2005)	15808508
B. subtilis FMN Riboswitch (Aptamer Domain)	FMN	197000	0.0024034	0.0122	100 mM KCl	2 mM MgCl2	50 mM MOPS (pH 7.5)	25	Stopped-Flow Fluorescence	Wickiser et al (2005)	15808508
V. cholerae Glycine Riboswitch (Aptamer Domain)	Glycine	28	0.0056	200	150 mM NaCl	5 mM MgCl2	10 mM HEPES (pH 7.4)	5	SPR	Chang et al. (2014)	24548121
V. cholerae Glycine Riboswitch (Aptamer Domain)	Glycine	720	0.0025	3.5	150 mM NaCl	20 mM MgCl2	10 mM HEPES (pH 7.4)	25	SPR	Chang et al. (2014)	24548121
Azoarcus Group I Ribozyme	Guanosine	2500	0.1325	53	50 mM Na	15 mM MgCl2	50 mM EPPS (pH 8)	30	Single-turnover kinetics	Gletisman and Herschlag (2014)	25246656
T. thermophila Group I Ribozyme	Guanosine	6666.67	0.733334	110	50 mM Na	10 mM MgCl2	50 mM EPPS (pH 8)	30	Single-turnover kinetics	Karbstein and Herschlag (2003)	12591943
env8 HyCbl Riboswitch	HyCbl	1300000	0.02	0.015	100 mM KCl, 25 mM KOH, 10 mM NaOH	1 mM MgCl2	50 mM HEPES (pH 7.7)	20	Stopped-Flow Fluorescence	Holmstrom et al (2014)	25325398
F. nucleatum PreQ1 Riboswitch (61 nt)	PreQ	126000	0.026	0.206349	100 mM KCl	2 mM MgCl2	50 mM KMOPS (pH 7.0)	25	Stopped-Flow Fluorescence	Rieder et al ( 2010)	20534493
F. nucleatum PreQ1 Riboswitch (70 nt)	PreQ	72600	0.019	0.261708	100 mM KCl	2 mM MgCl2	50 mM KMOPS (pH 7.0)	25	Stopped-Flow Fluorescence	Rieder et al ( 2010)	20534493
F. nucleatum PreQ1 Riboswitch (Aptamer Domain)	PreQ	602000	0.17	0.282392	100 mM KCl	2 mM MgCl2	50 mM KMOPS (pH 7.0)	25	Stopped-Flow Fluorescence	Rieder et al ( 2010)	20534493
S. pneumoniae PreQ-II Riboswitch (Aptamer Domain)	PreQ	29000	0.012	0.413793	100 mM KCl	2 mM MgCl2	50 mM KMOPS (pH 7.5)	20	Stopped-Flow Fluorescence	Souliere et al (2013)	23940363
S. pneumoniae PreQ-II Riboswitch (Aptamer Domain, ∆P4)	PreQ	1600000	-	3.4	100 mM KCl	2 mM MgCl2	50 mM KMOPS (pH 7.5)	20	Stopped-Flow Fluorescence	Souliere et al (2013)	23940363
SAM Riboswitch (Aptamer Domain)	SAM	14300	0.002	0.14	100 mM KCl	2 mM MgCl2	50 mM KMOPS (pH 7.5)	20	Stopped-Flow Fluorescence	Haller et al (2011)	21532598
TAR RNA	Neomycin	110	0.00137	12.4	-	-	-	RT	Acoustic Wave Biosensor	Tassew and Thompson (2003)	14556896
B. anthracis TPP Riboswitch (Aptamer Domain)	TPP	150000	0.00021	0.0014	150 mM NaCl	5 mM MgCl2	10 mM HEPES (pH 7.4)	25	SPR	Chang et al. (2014)	24548121
E.coli TPP Riboswitch	TPP	81300	0.034146	0.42	100 mM KCl	2 mM MgCl2	50 mM KMOPS (pH 7.5)	25	Stopped-Flow Fluorescence	Lang et al (2007)	17693433
E.coli TPP Riboswitch (Aptamer Domain)	TPP	142000	0.04615	0.325	100 mM KCl	2 mM MgCl2	50 mM KMOPS (pH 7.5)	25	Stopped-Flow Fluorescence	Lang et al (2007)	17693433
E. coli TPP Riboswitch (Aptamer Domain)	TPP	400000	0.00036	0.00089	150 mM NaCl	5 mM MgCl2	10 mM HEPES (pH 7.4)	25	SPR	Chang et al. (2014)	24548121

## Sheet: Table S3
Supplemental Table 3. Association Rate Constants for Proteins
Protein	Ligand	kon (M-1 s-1)	Reference	PMID
Acetohydroxy acid isomeroreductase	N-Hydroxy-N-isopropyloxamate	1900	Dumas et al. (1994)	8053906
Acetylcholinesterase	N-methylacridinium	11000000000	Nolte et al. (1980)	7407068
Actin	Gelsolin	15000	Selve and Wegner (1987)	2822398
Actin	Gelsolin	70000	Selve and Wegner (1987)	2822398
Adrenoxin reductase	Adrenoxin	6700000000	Lambeth et al. (1980)	6246080
Angiogenin	Human placental ribonuclease inhibitor	180000000	Lee et al. (1989)	2706245
Apoflavodoxin	FMN	191000	Ayuso-Tejedor et al. (2011)	21910456
Aspartate aminotransferase	Pyridoxamine phosphate	320000	Toney and Kirsch (1991)	1677270
Barnase	Barnstar	5000000000	Schreiber and Fersht (1996)	8612072
Bovine erythrocyte carbonic anhydrase	Clonal antibody CA04	130000	Lauwereys et al. (1998)	9649422
Bovine erythrocyte carbonic anhydrase	Clonal antibody CA05	64000	Lauwereys et al. (1998)	9649422
Bovine erythrocyte carbonic anhydrase	Clonal antibody CA06	72000	Lauwereys et al. (1998)	9649422
Bovine erythrocyte carbonic anhydrase	Clonal antibody CA10	25000	Lauwereys et al. (1998)	9649422
Carbonic anhydrase	HCO3-	15000000	Kernohan (1965)	14298834
Carbonic anhydrase	Benzenesulphonamide	156000	Kernohan (1966)	4960175
Carbonic anhydrase	Acetazolamide	5000000	Kernohan (1966)	4960175
Carbonic anhydrase II	4-carboxybenzenesulfonamide	48000	Day et al. (2002)	11967359
Carbonic anhydrase II	5-dimethyl-amino-1-naphthalene-sulfonamide	380000	Day et al. (2002)	11967359
Carbonic anhydrase II	5-dimethyl-amino-1-naphthalene-sulfonamide	390000	Day et al. (2002)	11967359
Casein kinase 2 β chain	α chain	67000	Martel et al. (2002)	12485876
Catalase	H2O2	5000000	Ogura (1955)	13259645
CD2 Protein	IgSF CAM CD58	400000	van der Merwe et al. (1994)	7520278
CheY	CheA	6400000	Stewart and Van Bruggen (2004)	14741223
CheY	CheA (P2S domain)	19000000	Stewart and Van Bruggen (2004)	14741223
CheY	CheA (P2L domain)	14000000	Stewart and Van Bruggen (2004)	14741223
Chymotrypsin	Furylacryloyl-L-tryptophanamide	6200000	Hess et al. (1970)	4399052
Chymotrypsin	Trifluorylacetyl-D-tryptophan	15000000	Smallcombe et al. (1972)	5036168
Chymotrypsin	Acetyl-L-tryptophan p-nitrophenyl ester	60000000	Renard and Fersht (1973)	4773852
Chymotrypsin	Pancreatic trypsin inhibitor	700000	Quast et al. (1974)	4857588
Cobra Venom Acetylcholinesterase	2-(N-methylmorpholinium)ethyl acetate	13800000	Radić et al. (1997)	9287336
Cobra Venom Acetylcholinesterase	2-(N-methylmorpholinium)ethyl acetate	450000	Radić et al. (1997)	9287336
Colicin E2 nuclease	Colicin-specific immunity protein Im2	520000000	Li et al. (2004)	15019791
Colicin E2 nuclease	Colicin-specific immunity protein Im7	520000000	Li et al. (2004)	15019791
Colicin E2 nuclease	Colicin-specific immunity protein Im8	790000000	Li et al. (2004)	15019791
Colicin E2 nuclease	Colicin-specific immunity protein Im9	330000000	Li et al. (2004)	15019791
Colicin E7 nuclease	Colicin-specific immunity protein Im2	230000000	Li et al. (2004)	15019791
Colicin E7 nuclease	Colicin-specific immunity protein Im7	760000000	Li et al. (2004)	15019791
Colicin E7 nuclease	Colicin-specific immunity protein Im8	410000000	Li et al. (2004)	15019791
Colicin E7 nuclease	Colicin-specific immunity protein Im9	160000000	Li et al. (2004)	15019791
Colicin E8 nuclease	Colicin-specific immunity protein Im2	590000000	Li et al. (2004)	15019791
Colicin E8 nuclease	Colicin-specific immunity protein Im7	780000000	Li et al. (2004)	15019791
Colicin E8 nuclease	Colicin-specific immunity protein Im8	660000000	Li et al. (2004)	15019791
Colicin E8 nuclease	Colicin-specific immunity protein Im9	620000000	Li et al. (2004)	15019791
Colicin E9	Immunity protein Im9	4000000000	Wallis et al. (1995)	7577966
Colicin E9 nuclease	Colicin-specific immunity protein Im2	80000000	Li et al. (2004)	15019791
Colicin E9 nuclease	Colicin-specific immunity protein Im8	60000000	Li et al. (2004)	15019791
Colicin E9 nuclease	Colicin-specific immunity protein Im9	90000000	Li et al. (2004)	15019791
Coxsackie B virus and adenovirus (Ad) receptor	Ad serotype 5 fiber knob	130000	Kirby et al. (2001)	11435605
Coxsackie B virus and adenovirus (Ad) receptor	Ad serotype 9 fiber knob	1600	Kirby et al. (2001)	11435605
Coxsackie B virus and adenovirus (Ad) receptor	Ad serotype 12 fiber knob	73000	Kirby et al. (2001)	11435605
Coxsackie B virus and adenovirus (Ad) receptor	Ad serotype 41L fiber knob	260000	Kirby et al. (2001)	11435605
Creatine kinase	Adenosine diphosphate	22000000	Hammes and Hurst (1969)	5813732
Creatine kinase	Adenosine diphosphate (complexed with Mg2+)	5300000	Hammes and Hurst (1969)	5813732
Creatine kinase	Adenosine diphosphate (complexed with Ca2+)	1700000	Hammes and Hurst (1969)	5813732
Creatine kinase	Adenosine diphosphate (complexed with Mn2+)	7400000	Hammes and Hurst (1969)	5813732
Creatine kinase	Adenosine triphosphate	10000000	Hammes and Hurst (1969)	5813732
Crotonase (Enoyl Coenzyme A Hydratase)	Crotonyl coA	280000000	Waterson and Hill (1972)	5057465
Crotonase (Enoyl Coenzyme A Hydratase)	Hexenoyl coA	105000000	Waterson and Hill (1972)	5057465
Crotonase (Enoyl Coenzyme A Hydratase)	Octonyl CoA	4970000	Waterson and Hill (1972)	5057465
Crotonase (Enoyl Coenzyme A Hydratase)	Decenoyl CoA	2110000	Waterson and Hill (1972)	5057465
Crotonase (Enoyl Coenzyme A Hydratase)	Dodecenoyl CoA	667000	Waterson and Hill (1972)	5057465
Crotonase (Enoyl Coenzyme A Hydratase)	Tetradecenoyl CoA	198000	Waterson and Hill (1972)	5057465
Crotonase (Enoyl Coenzyme A Hydratase)	Hexadecenoyl CoA	76700	Waterson and Hill (1972)	5057465
Cytochrome c	Monclonal antibody 2B5	650000	Raman et al. (1992)	1329947
cytochrome f	plastocyanin	180000000	He et al. (1991)	1756713
D-Galactose-binding	D-galactose	33000000	Quiocho (1988)	3058393
D-Galactose-binding	D-glucose	35000000	Quiocho (1988)	3058393
D-Maltose-binding	Cyclic maltoheptaose	22000000	Quiocho (1988)	3058393
D-Maltose-binding	D-Matrose	23000000	Quiocho (1988)	3058393
D-Maltose-binding	Maltotriose	25000000	Quiocho (1988)	3058393
D-Maltose-binding	Cyclic maltohexaose	36000000	Quiocho (1988)	3058393
DNP-BSA (Albumin from Bovine Serum (BSA), 2,4-Dinitrophenylated)	Immunoglobulin E	1100000	Xu et al. (1998)	9531278
E. coli RNase HI	RNA-DNA duplex (36 base-pairs)	1500000	Haruki et al. (1997)	9268340
E. Electricus Acetylcholinesterase	Acetylthiocholine	3500000000	Radić et al. (1997)	9287336
E. Electricus Acetylcholinesterase	Acetylthiocholine	217000000	Radić et al. (1997)	9287336
E. Electricus Acetylcholinesterase	2-(N-methylmorpholinium)ethyl acetate	10800000	Radić et al. (1997)	9287336
E. Electricus Acetylcholinesterase	2-(N-methylmorpholinium)ethyl acetate	667000	Radić et al. (1997)	9287336
E. Electricus Acetylcholinesterase	N-methylacridinium	90000000000	Radić et al. (1997)	9287336
E. Electricus Acetylcholinesterase	N-methylacridinium	8000000000	Radić et al. (1997)	9287336
EcoRI DNA methyltransferase	Double-stranded DNA (14 base-pairs)	17000000	Allan et al. (1988)	9442083
Elastase	Elafin	3600000	Ying and Simon (1993)	8439544
EmrE multidrug transporter	Tetraphenylphosphonium	400000	Adam et al. (2007)	17984053
EmrE multidrug transporter	Tetraphenylphosphonium	20000000	Adam et al. (2007)	17984053
EmrE multidrug transporter	Triphenylmethylphosphonium	3700000	Adam et al. (2007)	17984053
EmrE multidrug transporter	Ethidium	4900000	Adam et al. (2007)	17984053
Endoxylanase	Wheat endoxylanase inhibitor TAXI-I	360000	Fierens et al. (2005)	16279951
Fab	Flu virus hemagglutinin	110000	Fleury et al. (1998)	9461077
Fab 13B5	HIV-I capsid protein p24	350000	Monaco-Malbet et al. (2000)	11080628
Fcγ Receptor IIa	Human IgG1	420000	Maenaka et al. (2001)	11544262
Fcγ Receptor IIa	Human IgG1, Fc fragment	460000	Maenaka et al. (2001)	11544262
Fcγ Receptor IIb	Human IgG1	380000	Maenaka et al. (2001)	11544262
Fcγ Receptor IIb	Human IgG1, Fc fragment	540000	Maenaka et al. (2001)	11544262
Fcγ Receptor IIIb (allele NA2)	Human IgG1	320000	Maenaka et al. (2001)	11544262
Fcγ Receptor IIIb (allele NA2)	Human IgG1, Fc fragment	540000	Maenaka et al. (2001)	11544262
Ferredoxin−NADP+ reductase	Flavodoxin	210000000	Medina et al. (1992)	1459139
Fumarase	L-malate	36000000	Teipel et al. (1968)	5748979
GABA(A) Receptor	Muscimol	220000000	Hollis and Boyd (2003)	14604774
Glyceraldehyde 3-phosphate dehydrogenase	NAD	19000000	Kirschner et al. (1966)	16591399
Hemoglobin α chains	Carboxyheme	40000000	Hargrove et al. (1996)	8784183
Hemoglobin β chains	Carboxyheme	70000000	Hargrove et al. (1996)	8784183
HIV-1 integrase (dimer)	Lens epithelium-derived growth factor/transcriptional co-activator p75	475000	Tsiang et al. (2009)	19801648
HIV-1 integrase (monomer)	HIV-1 integrase (monomer)	2080000	Tsiang et al. (2009)	19801648
Horse myoglobin	Carboxyheme	140000000	Hargrove et al. (1996)	8784183
horseradish peroxidase (HRP)	H2O2	18000000	Dolman et al. (1975)	237615
horseradish peroxidase (HRP)	Hydrogen cyanide	120000	Dolman et al. (1975)	237615
HPr Kinase/Phosphatase	Histidine-containing protein	130000	Lavergne et al. (2002)	12009882
HPr Kinase/Phosphatase	Crh (catabolite repression HPr)	0.00012	Lavergne et al. (2002)	12009882
Human Acetylcholinesterase	Acetylthiocholine	96700000	Radić et al. (1997)	9287336
Human Acetylcholinesterase	Acetylthiocholine	26700000	Radić et al. (1997)	9287336
Human angiotensin-converting enzyme 2	(S)-protein TOR2	71000	Li et al. (2005)	15791205
Human CD8αα	Major histocompatibility complex class I molecule HLA-A2	100000	Wyer et al. (1999)	10072074
Human growth horomone	Extracellular domain of the human growth hormone receptor	400000	Cunningham and Wells (1993)	7504735
Human holocarboxylase synthetase	Propionyl-CoA carboxylase	32000	Ingaramo and Beckett (2012)	22123817
Human holocarboxylase synthetase	Methylcrotonoyl-CoA carboxylase	20000	Ingaramo and Beckett (2012)	22123817
Human holocarboxylase synthetase	Pyruvate carboxylase	12000	Ingaramo and Beckett (2012)	22123817
Human holocarboxylase synthetase	Propionyl-CoA carboxylase	35000	Ingaramo and Beckett (2012)	22123817
Human holocarboxylase synthetase	Methylcrotonoyl-CoA carboxylase	19000	Ingaramo and Beckett (2012)	22123817
Human holocarboxylase synthetase	Pyruvate carboxylase	10000	Ingaramo and Beckett (2012)	22123817
Human myoglobin	Carboxyheme	210000000	Hargrove et al. (1996)	8784183
I Domain of Integrin αL	Intracellular adhesion molecule-1	3100	Shimaoka et al. (2003)	12526797
Immunoglobulin E	{ε-[(2,4 DNP)amino]caproyl}-l-tyrosine	20000000	Xu et al. (1998)	9531278
L-arabinose binding protein	D-galactose	8000000	Quiocho (1988)	3058393
L-arabinose binding protein	D-fucose	12000000	Quiocho (1988)	3058393
L-arabinose binding protein	L-arabinose	24000000	Quiocho (1988)	3058393
Lactate dehydrogenase	NADH	33000000	Heck Hde (1969)	4308856
Lactate dehydrogenase	Oxamate	8100000	Heck Hde (1969)	4308856
Lactate dehydrogenase	3-thionicotinamide adenine dinucleotide	5800000	Heck Hde (1969)	4308856
Lactate dehydrogenase	NADH	1700000000	Czerlinski and Schreck (1964)	14154473
Lactose permease	4–nitrophenyl-α-D-galactopyranoside	4300000	Smirnova et al. (2006)	17176050
Liver alcohol dehydrogenase	NADH	25000000	Shore and Gutfreund (1970)	4319985
Lysozyme	NAG2	40000000	Holler et al. (1969)	5349281
malate dehydrogenase	NADH	680000000	Czerlinski and Schreck (1964)	14114510
Matrix metalloproteinase 1	Tissue inhibitor of metalloproteinase-1	160000	Troeberg et al. (2002)	12475252
Matrix metalloproteinase-2	Tissue inhibitor of metalloproteinase-1	220000	Olson et al. (1997)	9368077
Matrix metalloproteinase-2	Tissue inhibitor of metalloproteinase-1	250000	Olson et al. (1997)	9368077
Matrix metalloproteinase-9	Tissue inhibitor of metalloproteinase-2	57000	Olson et al. (1997)	9368077
Matrix metalloproteinase-9	Tissue inhibitor of metalloproteinase-1	250000	Olson et al. (1997)	9368077
Mlc global repressor	EIIB protein	995000	Nam et al. (2008)	18319344
Mouse Acetylcholinesterase	m-trimethylammoniotrifluoroacetophenone	36700000	Radić et al. (1997)	9287336
Mouse Acetylcholinesterase	m-trimethylammoniotrifluoroacetophenone	80000000	Radić et al. (1997)	9287336
Mouse Acetylcholinesterase	m-trimethylammoniotrifluoroacetophenone	4970000000	Radić et al. (1997)	9287336
Mouse Acetylcholinesterase	m-trimethylammoniotrifluoroacetophenone	2170000000	Radić et al. (1997)	9287336
Mouse Acetylcholinesterase	Fasciculin 2	817000000	Radić et al. (1997)	9287336
Mouse Acetylcholinesterase	Fasciculin 2	118000	Radić et al. (1997)	9287336
Mouse Acetylcholinesterase	Acetylthiocholine	41700000	Radić et al. (1997)	9287336
Mouse Acetylcholinesterase	Acetylthiocholine	25000000	Radić et al. (1997)	9287336
Mouse Acetylcholinesterase	Phenylacetate	2000000	Radić et al. (1997)	9287336
Mouse Acetylcholinesterase	Phenylacetate	2000000	Radić et al. (1997)	9287336
Mouse Acetylcholinesterase	p-nitrophenylacetate	125000	Radić et al. (1997)	9287336
Mouse Acetylcholinesterase	p-nitrophenylacetate	125000	Radić et al. (1997)	9287336
Murine V β8.2Jβ2.1Cβ1 (murine T cell antigen receptor β chain)	superantigens (SAGs): SEA, SEB, SEC1, SEC2 and SEC3	100000	Malchiodi et al. (1995)	7500029
Myosin	Actin	5000000	De La Cruz and Ostap (2009)	19289206
Old Yellow enzyme	FMN	1000000	Nygaard and Theorell (1955)
Oligopeptide Binding Protein	Peptide (SLSQSKVLP)	7000000	Lanfermeijer et al. (1999)	10545166
p51 HIV reverse transcriptase subunit	p66 HIV reverse transcriptase subunit	1.7	Venezia et al. (2009)	19715314
Phenylalanyl-tRNA synthase	tRNA	32000000	Holler (1980)	6992864
Plasminogen activator inhibitor-1	Somatomedin B	14000000	Blouse et al. (2009)	19193026
Porcine pancreatic α-amylase	Antibody fragment AM-B7	150000	Lauwereys et al. (1998)	9649422
Porcine pancreatic α-amylase	Antibody fragment AM-B10	40000	Lauwereys et al. (1998)	9649422
Porcine pancreatic α-amylase	Antibody fragment AM-D7	162000	Lauwereys et al. (1998)	9649422
Porcine pancreatic α-amylase	Antibody fragment AM-D9	240000	Lauwereys et al. (1998)	9649422
Protective antigen receptor/capillary morphogenesis protein 2	Protective antigen moiety of anthrax toxin, PA83	110000	Wigelsworth et al. (2004)	15044490
Protein 315 (monomeric form)	Dinitrophenyl-glycine	190000000	Pecht et al. (1972)	5069790
Protein 315 (polymeric form)	ε,N-Dinitrophenyl-L-lysine	130000000	Pecht et al. (1972)	5069790
Protein-315	DNP-CH3	350000000	Haselkorn et al. (1974)	4826892
Pyruvate carboxylase	Pyruvate	4500000	Mildvan and Scrutton (1967)	6069856
Ras protein	Ral guanine dissociation stimulator	3400000	Kiel et al. (2004)	15197281
Ras protein	c-Raf kinase protein	52000000	Kiel et al. (2004)	15197281
Ras-like nuclear protein	2'-deoxy-3'-O- (N-methylanthraniloyl)guanosine diphosphate	1900000	Klebe et al. (1995)	7548002
Ras-like nuclear protein	2'-deoxy-3'-O- (N-methylanthraniloyl)guanosine triphosphate	1000000	Klebe et al. (1995)	7548002
Ras-like nuclear protein complexed with regulator of chromosome condensation 1	2'-deoxy-3'-O- (N-methylanthraniloyl)guanosine diphosphate	11400000	Klebe et al. (1995)	7548002
Ras-like nuclear protein complexed with regulator of chromosome condensation 1	2'-deoxy-3'-O- (N-methylanthraniloyl)guanosine triphosphate	650000	Klebe et al. (1995)	7548002
Ras-like nuclear protein, GDP state	Regulator of chromosome condensation 1	74400000	Klebe et al. (1995)	7548002
Ras-like nuclear protein, GTP state	Regulator of chromosome condensation 1	102000000	Klebe et al. (1995)	7548002
RNAse A	Human placental ribonuclease inhibitor	340000000	Lee et al. (1989)	2706245
S-protein	S-peptide analog Pep-1	20000000	Goldberg and Baldwin (1998)	9485404
S-protein	S-peptide analog M13A-1	18000000	Goldberg and Baldwin (1998)	9485404
Serum albumin binding protein	Human serum albumin	550000	Jonsson et al. (2008)	18499681
Serum albumin binding protein (variant: ABD011)	Human serum albumin	8000000	Jonsson et al. (2008)	18499681
Serum albumin binding protein (variant: ABD035)	Human serum albumin	30000000	Jonsson et al. (2008)	18499681
Sheep myoglobin	Carboxyheme	140000000	Hargrove et al. (1996)	8784183
Soybean leghemoglobin	Carboxyheme	50000000	Hargrove et al. (1996)	8784183
Sperm whale myoglobin	Carboxyheme	50000000	Hargrove et al. (1996)	8784183
Streptokinase	Plasmin	54000000	Cederholm-Williams et al. (1979)	158524
Superoxide dismutase	Superoxide	6700000000	Polticelli et al. (1998)	9828001
T. Californica Acetylcholinesterase	Acetylthiocholine	142000000	Radić et al. (1997)	9287336
T. Californica Acetylcholinesterase	Acetylthiocholine	48300000	Radić et al. (1997)	9287336
T. Californica Acetylcholinesterase	m-trimethylammoniotrifluoroacetophenone	85000000000	Radić et al. (1997)	9287336
T. Californica Acetylcholinesterase	m-trimethylammoniotrifluoroacetophenone	4500000000	Radić et al. (1997)	9287336
TEM1 β-lactamase	β-lactamase Protein Inhibitor	220000	Selzer et al. (2000)	10876236
TEM1 β-lactamase	β-lactamase Protein Inhibitor (V165K,D163K,D135K,N89K)	47000000	Selzer et al. (2000)	10876236
Thrombin	Recombinant Hirudin	1100000	Stone et al. (1989)	2819038
Transforming growth factor β3	Transforming growth factor β3 type II receptor	740000	Baardsnes et al. (2009)	19161338
triosephosphate isomerase	Glyceraldehyde 3-phosphate	9400000	Putman et al. (1972)	4643318
Triosephosphate isomerase	Dihydroxy acetone phosphate	89000000	Putman et al. (1972)	4643318
Trypsin	Ecotin	860000	Eggers et al. (2001)	11352586
Tyrosyl tRNA synthase	Tyrosine	2400000	Fersht et al. (1975)	162826
Uracil-DNA glycosylase	Uracil-DNA glycosylase inhibitor	150000000	Bennett et al. (1993)	8262921
Variable region of shark immunoglobulin antigen receptor	Epigonal clone 6	210000	Dooley et al. (2006)	16446445
Yeast iso-1-cytochrome c	Cytochrome c peroxidase compound I	3000000000	Mei et al. (1996)	8961943
Yeast NADPH-cytochrome P450 reductase	FMN	84000	Ivanov et al. (2010)	20557022
Yeast NADPH-cytochrome P450 reductase	Flavin adenine dinucleotide	1360	Ivanov et al. (2010)	20557022
Yeast profilin	Actin	6600000	Wen et al. (2008)	18223293
α-chymotrypsin	Serine protease inhibitor peptide PMP-C	800000	Kellenberger et al. (1995)	7592720
β-glucosidase	Azafagomine	18000	Plesner et al. (2001)	11488621
β-lactamase	Benzylpenicillin	100000000	Fisher et al. (1980)	6994800
β-lactamase	Cephalothin	600000	Fisher et al. (1980)	6994800
Protein
N = 207
Average kon = 1.2 x 109 M-1 s-1
Median kon = 6.6 x 106 M-1 s-1

## Sheet: Table of Abbreviations
Table of Abbreviations
2AP	2-Aminopurine
4-DABCYL	4-((4-(dimethylamino)phenyl)azo)benzoic Acid
6-FAM	6-Carboxyfluorescein
c-di-GMP	Bis-(3'-5')-cyclic dimeric guanosine monophosphate
CoA	Coenzyme A
DFHBI	(5Z)-5-[(3,5-Difluoro-4-hydroxyphenyl)methylene]-3,5-dihydro-2,3-dimethyl- 4H-Imidazol-4-one, (Z)-4-(3,5-Difluoro-4-hydroxybenzylidene)-1,2-dimethyl-1H-imidazol-5(4H)-one
DNP	2,4-dinitrophenol
dsRNA	double-stranded RNA
EDTA	Ethylenediaminetetraacetic acid
EPPS	4-(2-Hydroxyethyl)-1-piperazinepropanesulfonic acid
FMN	Flavin mononucleotide
FRET	Fluorescence resonance energy transfer
GTP	Guanosine triphosphate
HEPES	4-(2-hydroxyethyl)-1-piperazineethanesulfonic acid)
HyCbl	Hydroxocobalamin
ITC	Isothermal titration calorimetry
KMOPS	Potassium (3-(N-morpholino)propanesulfonic acid)
KP	Potassium phosphate
MES	2-Ethanesulfonic acid
MOPS	(3-(N-morpholino)propanesulfonic acid)
NaCac	Sodium cacodylate
NAD	Nicotinamide adenine dinucleotide, oxidized
NADH	Nicotinamide adenine dinucleotide, reduced
NaP	Sodium phosphate
NMR	Nuclear magnetic resonance
OAc	Acetate
PIPES	Piperazine-N,N′-bis(2-ethanesulfonic acid)
PreQ	Pre-queuosine
RT	Room temperature (20 - 22 °C)
SAH	S-Adenosyl-L-homocysteine
SAM	S-Adenosyl methionine
smFRET	single-molecule fluorescence resonance energy transfer
SPR	Surface plasmon resonance
ssRNA	single-stranded RNA
TPP	Thiamine pyrophosphate
Tris	Tris(hydroxymethyl)aminomethane
