# Supplementary material
Source: HighWire-hosted journal article supplement (doi:10.1101/rna.062026.117)
Supplement: Supplemental_Table_S4.xlsx [file Supplemental_Table_S4.xlsx]

## Sheet: Table 2
Table 2. Association Rate Constants for Structured RNAs Binding Small Molecule Ligands
RNA	Small Molecule Ligand	kon (M-1 s-1)	koff (s-1)	Kd (µM)	[M+]	[M2+]	Buffer	Temperature (oC)	Method	Reference	PMID
B. subtilis Adenine Riboswitch (Aptamer Domain)	2AP	263000	0.151	0.574144	100 mM KCl	2 mM MgCl2	50 mM NaMOPS (pH 7.5)	5	Stopped-Flow Fluorescence	Wickiser et al (2005)	16201765
V. vulnificus Adenine Riboswitch	Adenine	37300	0.087282	2.34	100 mM KCl	2 mM MgCl2	50 mM KMOPS (pH 7.5)	20	Stopped-Flow Fluorescence	Rieder et al (2007)	17440909
V. vulnificus Adenine Riboswitch (Aptamer Domain)	Adenine	34700	0.023596	0.68	100 mM KCl	2 mM MgCl2	50 mM KMOPS (pH 7.5)	20	Stopped-Flow Fluorescence	Rieder et al (2007)	17440909
V. cholerae c-di-GMP Riboswitch (Aptamer Domain)	c-di-GMP	16700	1.8e-07	1.1e-05	10 mM KCl	10 mM MgCl2	10 mM NaCac (pH 6.8)	21	Gel Shift Assay	Smith et al (2009)	19898477
V. cholerae c-di-GMP Riboswitch (Aptamer Domain)	c-di-GMP	23000	2.3e-05	0.00098	150 mM NaCl	5 mM MgCl2	10 mM HEPES (pH 7.4)	25	SPR	Chang et al. (2014)	24548121
C. difficile c-di-GMP Riboswitch (Aptamer Domain)	c-di-GMP	160000	0.0096	0.06	150 mM NaCl	5 mM MgCl2	10 mM HEPES (pH 7.4)	25	SPR	Chang et al. (2014)	24548121
B. subtilis FMN Riboswitch	FMN	20600	5.43689	0.112	100 mM KCl	2 mM MgCl2	50 mM MOPS (pH 7.5)	25	Stopped-Flow Fluorescence	Wickiser et al (2005)	15808508
B. subtilis FMN Riboswitch (Aptamer Domain)	FMN	197000	0.0024034	0.0122	100 mM KCl	2 mM MgCl2	50 mM MOPS (pH 7.5)	25	Stopped-Flow Fluorescence	Wickiser et al (2005)	15808508
V. cholerae Glycine Riboswitch (Aptamer Domain)	Glycine	28	0.0056	200	150 mM NaCl	5 mM MgCl2	10 mM HEPES (pH 7.4)	5	SPR	Chang et al. (2014)	24548121
V. cholerae Glycine Riboswitch (Aptamer Domain)	Glycine	720	0.0025	3.5	150 mM NaCl	20 mM MgCl2	10 mM HEPES (pH 7.4)	25	SPR	Chang et al. (2014)	24548121
Azoarcus Group I Ribozyme	Guanosine	2500	0.1325	53	50 mM Na	15 mM MgCl2	50 mM EPPS (pH 8)	30	Single-turnover kinetics	Gletisman and Herschlag (2014)	25246656
T. thermophila Group I Ribozyme	Guanosine	6666.67	0.733334	110	50 mM Na	10 mM MgCl2	50 mM EPPS (pH 8)	30	Single-turnover kinetics	Karbstein and Herschlag (2003)	12591943
env8 HyCbl Riboswitch	HyCbl	1300000	0.02	0.015	100 mM KCl, 25 mM KOH, 10 mM NaOH	1 mM MgCl2	50 mM HEPES (pH 7.7)	20	Stopped-Flow Fluorescence	Holmstrom et al (2014)	25325398
F. nucleatum PreQ1 Riboswitch (61 nt)	PreQ	126000	0.026	0.206349	100 mM KCl	2 mM MgCl2	50 mM KMOPS (pH 7.0)	25	Stopped-Flow Fluorescence	Rieder et al ( 2010)	20534493
F. nucleatum PreQ1 Riboswitch (70 nt)	PreQ	72600	0.019	0.261708	100 mM KCl	2 mM MgCl2	50 mM KMOPS (pH 7.0)	25	Stopped-Flow Fluorescence	Rieder et al ( 2010)	20534493
F. nucleatum PreQ1 Riboswitch (Aptamer Domain)	PreQ	602000	0.17	0.282392	100 mM KCl	2 mM MgCl2	50 mM KMOPS (pH 7.0)	25	Stopped-Flow Fluorescence	Rieder et al ( 2010)	20534493
S. pneumoniae PreQ-II Riboswitch (Aptamer Domain)	PreQ	29000	0.012	0.413793	100 mM KCl	2 mM MgCl2	50 mM KMOPS (pH 7.5)	20	Stopped-Flow Fluorescence	Souliere et al (2013)	23940363
S. pneumoniae PreQ-II Riboswitch (Aptamer Domain, ∆P4)	PreQ	1600000	-	3.4	100 mM KCl	2 mM MgCl2	50 mM KMOPS (pH 7.5)	20	Stopped-Flow Fluorescence	Souliere et al (2013)	23940363
SAM Riboswitch (Aptamer Domain)	SAM	14300	0.002	0.14	100 mM KCl	2 mM MgCl2	50 mM KMOPS (pH 7.5)	20	Stopped-Flow Fluorescence	Haller et al (2011)	21532598
TAR RNA	Neomycin	110	0.00137	12.4	-	-	-	RT	Acoustic Wave Biosensor	Tassew and Thompson (2003)	14556896
B. anthracis TPP Riboswitch (Aptamer Domain)	TPP	150000	0.00021	0.0014	150 mM NaCl	5 mM MgCl2	10 mM HEPES (pH 7.4)	25	SPR	Chang et al. (2014)	24548121
E.coli TPP Riboswitch	TPP	81300	0.034146	0.42	100 mM KCl	2 mM MgCl2	50 mM KMOPS (pH 7.5)	25	Stopped-Flow Fluorescence	Lang et al (2007)	17693433
E.coli TPP Riboswitch (Aptamer Domain)	TPP	142000	0.04615	0.325	100 mM KCl	2 mM MgCl2	50 mM KMOPS (pH 7.5)	25	Stopped-Flow Fluorescence	Lang et al (2007)	17693433
E. coli TPP Riboswitch (Aptamer Domain)	TPP	400000	0.00036	0.00089	150 mM NaCl	5 mM MgCl2	10 mM HEPES (pH 7.4)	25	SPR	Chang et al. (2014)	24548121

## Sheet: Table S4
Supplemental Table 4. Association Rate Constants for Proteins Binding RNAs
Protein	ssRNA Ligand	kon (M-1 s-1)	koff (s-1)	Kd (µM)	[M+]	[M2+]	Buffer	Temperature (oC)	Method	Reference	PMID
eIF4F	ssRNAFerritin IRE-RNA (30 nt)	81000000	4.8	0.059	100 mM KCl	1 mM MgCl2	40 mM HEPES/H+ (pH 7.2)	25	Stopped-Flow Fluorescence	Khan et al. (2014)	24728987
Hsp70	ssRNA (TNFα ARE, 38 nt)	2000000	0.06	0.28	100 mM KCl	-	10 mM Tris-HCl (pH 8)	25	Gel Shift Assay with Fluorescence Substrates	Wilson et al. (2001)	11581272
HuD	ssRNA(AU-3 RNA, 38 nt)	4210000	0.00305	0.0007	150 mM NaCl	-	10 mM Tris-HCl (pH 8)	25	SPR	Park et al (2000)	10848602
HuD	ssRNA (13AU3)	640000	0.0054	0.00844	150 mM NaCl	-	10 mM Tris-HCl (pH 8)	RT	SPR	Park-Lee et al (2003)	12900401
IRP1	ssRNAFerritin IRE-RNA (30 nt)	400000000	6.2	0.0142	100 mM KCl	1 mM MgCl2	40 mM HEPES/H+ (pH 7.2)	25	Stopped-Flow Fluorescence Anisotropy	Khan et al. (2014)	24728987
IRP1	ssRNAACO2 (mt aconitase) IRE-RNA (30 nt)	51500000	7	0.136	100 mM KCl	1 mM MgCl2	40 mM HEPES/H+ (pH 7.2)	25	Stopped-Flow Fluorescence Anisotropy	Khan et al. (2014)	24728987
R17 Coat Protein	R17 RNA, 21 nt	940000	0.012	0.012766	80 mM KCl	10 mM Mg(OAc)2	100 mM Tris-HCl (pH 8.5)	2	Filter Retention Assay	Carey et al. (1983)	6626527
RNase A	6-FAM∼dArU(dA)2∼4-DABCYL	2800000000	-	-	10 mM NaCl	-	1 mM Tris-HCl (pH 8)	23	Single-turnover kinetics	Park and Raines (2003)	12653555
Protein	dsRNA Ligand	kon (M-1 s-1)	koff (s-1)	Kd (µM)	[M+]	[M2+]	Buffer	Temperature (oC)	Method	Reference	PMID
Bacteriophage MS2 coat protein subunit	Wild-Type Operator RNA fragments	2070000000	2.2	0.00106	80 mM KCl	10 mM MgCl2	100 mM Tris-HCl (pH 7.4)	20	Stopped-Flow Fluorescence	Lago et al (2001)	11162119
L7Ae	dsRNA/Bulge (Kt-7 kink turn)	54000000	0.002	3.7e-05	-	-	90 mM Tris-Borate (pH 8.3)	4	Stopped-Flow Fluorescence	Turner and Lilley (2008)	18603260
L7Ae	dsRNA/Bulge (Kt-7 kink turn)	200000000	0.002	1e-05	-	-	90 mM Tris-Borate (pH 8.3)	4	Stopped-Flow Fluorescence	Turner and Lilley (2008)	18603260
L7Ae	dsRNA/Bulge (Kt-7 kink turn)	8400000	0.002	0.000238	-	-	2 mM Tris-HCl (pH 8.0)	RT	Single-Molecule FRET	Wang et al. (2012)	23260056
Mouse AGO2	let-7A (Complete miRNA precursor)	390000000	-	-	120 mM KOAc	3.5 mM MgOAc	30 mM HEPES-KOH (pH 7.9)	37	Single-Molecule Imaging	Salomon et al (2015)	26140592
N Protein	dsRNA(stem loop) 3LeaderTAS	78100	0.00022	0.0028169	150 mM NaCl	-	10 mM HEPES (pH 7.4)	RT	SPR	Chen et al. (2005)	15613344
S. cerevisiae RNase III	dsRNA(w/ tetraloop)	648000	0.00106	0.0016	140 mM NaCl	-	25 mM HEPES (pH 7.4)	RT	SPR	Chanfreau et al (2000)	10716739
U1A	dsRNA(hairpin); U1A hairpin	11000000	0.00036	3.2e-05	150 mM NaCl	-	40 mM Tris-HCl (pH 8.0)	RT	SPR	Katsamba et al. (2001)	11297556
Protein	RNA ligands (Structured)	kon (M-1 s-1)	koff (s-1)	Kd (µM)	[M+]	[M2+]	Buffer	Temperature (oC)	Method	Reference	PMID
CYT-18	bI4 Group I Intron	7.16667e+07	6.67e-05	9.3e-07	50 mM KCl	7 mM MgCl2	50 mM HEPES (pH 7.6)	35	Filter Binding Assay	Webb et al. (2001)	11399081
FtsY	SRP RNA	45800	0.00146	0.0318777	150 mM KOAc	2 mM Mg(OAc)	50 mM KHEPES (pH 7.5)	RT	Fluorescence	Shen and Shan (2010)	20385832
HIV-1 Rev Protein	Rev response element	440000	0.038	0.0864	450 mM NaCl	-	10 mM HEPES (pH 7.4)	RT	SPR	Van Ryk et al. (1999)	10364175
Pseudouridine synthase (Pus1)	tRNAPhe	450000	0.00075	0.0038	100 mM KCl	-	50 mM Tris-HCl (pH 8)	RT	SPR	Arluison et al. (1999)	10356324
Pseudouridine synthase (Pus1)	tRNAlle	2400	0.00064	0.2	100 mM KCl	-	50 mM Tris-HCl (pH 8)	RT	SPR	Arluison et al. (1999)	10356324
S8 Protein	16S rRNA	250000	0.0069	0.028	350 mM KCl	20 mM MgCl2	Tris-HCl (pH 7.5)	0	Filter Binding Assay	Mougel et al. (1986)	3521721
Protein
N = 22
Average kon = 2.8 x 108 M-1 s-1
Median kon = 6.3 x 106 M-1 s-1

## Sheet: Table of Abbreviations
Table of Abbreviations
2AP	2-Aminopurine
4-DABCYL	4-((4-(dimethylamino)phenyl)azo)benzoic Acid
6-FAM	6-Carboxyfluorescein
c-di-GMP	Bis-(3'-5')-cyclic dimeric guanosine monophosphate
CoA	Coenzyme A
DFHBI	(5Z)-5-[(3,5-Difluoro-4-hydroxyphenyl)methylene]-3,5-dihydro-2,3-dimethyl- 4H-Imidazol-4-one, (Z)-4-(3,5-Difluoro-4-hydroxybenzylidene)-1,2-dimethyl-1H-imidazol-5(4H)-one
DNP	2,4-dinitrophenol
dsRNA	double-stranded RNA
EDTA	Ethylenediaminetetraacetic acid
EPPS	4-(2-Hydroxyethyl)-1-piperazinepropanesulfonic acid
FMN	Flavin mononucleotide
FRET	Fluorescence resonance energy transfer
GTP	Guanosine triphosphate
HEPES	4-(2-hydroxyethyl)-1-piperazineethanesulfonic acid)
HyCbl	Hydroxocobalamin
ITC	Isothermal titration calorimetry
KMOPS	Potassium (3-(N-morpholino)propanesulfonic acid)
KP	Potassium phosphate
MES	2-Ethanesulfonic acid
MOPS	(3-(N-morpholino)propanesulfonic acid)
NaCac	Sodium cacodylate
NAD	Nicotinamide adenine dinucleotide, oxidized
NADH	Nicotinamide adenine dinucleotide, reduced
NaP	Sodium phosphate
NMR	Nuclear magnetic resonance
OAc	Acetate
PIPES	Piperazine-N,N′-bis(2-ethanesulfonic acid)
PreQ	Pre-queuosine
RT	Room temperature (20 - 22 °C)
SAH	S-Adenosyl-L-homocysteine
SAM	S-Adenosyl methionine
smFRET	single-molecule fluorescence resonance energy transfer
SPR	Surface plasmon resonance
ssRNA	single-stranded RNA
TPP	Thiamine pyrophosphate
Tris	Tris(hydroxymethyl)aminomethane
