# Supplementary material
Source: HighWire-hosted journal article supplement (doi:10.1101/rna.062026.117)
Supplement: Supplemental_Table_S5.xlsx [file Supplemental_Table_S5.xlsx]

## Sheet: Table 2
Table 2. Association Rate Constants for Structured RNAs Binding Small Molecule Ligands
RNA	Small Molecule Ligand	kon (M-1 s-1)	koff (s-1)	Kd (µM)	[M+]	[M2+]	Buffer	Temperature (oC)	Method	Reference	PMID
B. subtilis Adenine Riboswitch (Aptamer Domain)	2AP	263000	0.151	0.574144	100 mM KCl	2 mM MgCl2	50 mM NaMOPS (pH 7.5)	5	Stopped-Flow Fluorescence	Wickiser et al (2005)	16201765
V. vulnificus Adenine Riboswitch	Adenine	37300	0.087282	2.34	100 mM KCl	2 mM MgCl2	50 mM KMOPS (pH 7.5)	20	Stopped-Flow Fluorescence	Rieder et al (2007)	17440909
V. vulnificus Adenine Riboswitch (Aptamer Domain)	Adenine	34700	0.023596	0.68	100 mM KCl	2 mM MgCl2	50 mM KMOPS (pH 7.5)	20	Stopped-Flow Fluorescence	Rieder et al (2007)	17440909
V. cholerae c-di-GMP Riboswitch (Aptamer Domain)	c-di-GMP	16700	1.8e-07	1.1e-05	10 mM KCl	10 mM MgCl2	10 mM NaCac (pH 6.8)	21	Gel Shift Assay	Smith et al (2009)	19898477
V. cholerae c-di-GMP Riboswitch (Aptamer Domain)	c-di-GMP	23000	2.3e-05	0.00098	150 mM NaCl	5 mM MgCl2	10 mM HEPES (pH 7.4)	25	SPR	Chang et al. (2014)	24548121
C. difficile c-di-GMP Riboswitch (Aptamer Domain)	c-di-GMP	160000	0.0096	0.06	150 mM NaCl	5 mM MgCl2	10 mM HEPES (pH 7.4)	25	SPR	Chang et al. (2014)	24548121
B. subtilis FMN Riboswitch	FMN	20600	5.43689	0.112	100 mM KCl	2 mM MgCl2	50 mM MOPS (pH 7.5)	25	Stopped-Flow Fluorescence	Wickiser et al (2005)	15808508
B. subtilis FMN Riboswitch (Aptamer Domain)	FMN	197000	0.0024034	0.0122	100 mM KCl	2 mM MgCl2	50 mM MOPS (pH 7.5)	25	Stopped-Flow Fluorescence	Wickiser et al (2005)	15808508
V. cholerae Glycine Riboswitch (Aptamer Domain)	Glycine	28	0.0056	200	150 mM NaCl	5 mM MgCl2	10 mM HEPES (pH 7.4)	5	SPR	Chang et al. (2014)	24548121
V. cholerae Glycine Riboswitch (Aptamer Domain)	Glycine	720	0.0025	3.5	150 mM NaCl	20 mM MgCl2	10 mM HEPES (pH 7.4)	25	SPR	Chang et al. (2014)	24548121
Azoarcus Group I Ribozyme	Guanosine	2500	0.1325	53	50 mM Na	15 mM MgCl2	50 mM EPPS (pH 8)	30	Single-turnover kinetics	Gletisman and Herschlag (2014)	25246656
T. thermophila Group I Ribozyme	Guanosine	6666.67	0.733334	110	50 mM Na	10 mM MgCl2	50 mM EPPS (pH 8)	30	Single-turnover kinetics	Karbstein and Herschlag (2003)	12591943
env8 HyCbl Riboswitch	HyCbl	1300000	0.02	0.015	100 mM KCl, 25 mM KOH, 10 mM NaOH	1 mM MgCl2	50 mM HEPES (pH 7.7)	20	Stopped-Flow Fluorescence	Holmstrom et al (2014)	25325398
F. nucleatum PreQ1 Riboswitch (61 nt)	PreQ	126000	0.026	0.206349	100 mM KCl	2 mM MgCl2	50 mM KMOPS (pH 7.0)	25	Stopped-Flow Fluorescence	Rieder et al ( 2010)	20534493
F. nucleatum PreQ1 Riboswitch (70 nt)	PreQ	72600	0.019	0.261708	100 mM KCl	2 mM MgCl2	50 mM KMOPS (pH 7.0)	25	Stopped-Flow Fluorescence	Rieder et al ( 2010)	20534493
F. nucleatum PreQ1 Riboswitch (Aptamer Domain)	PreQ	602000	0.17	0.282392	100 mM KCl	2 mM MgCl2	50 mM KMOPS (pH 7.0)	25	Stopped-Flow Fluorescence	Rieder et al ( 2010)	20534493
S. pneumoniae PreQ-II Riboswitch (Aptamer Domain)	PreQ	29000	0.012	0.413793	100 mM KCl	2 mM MgCl2	50 mM KMOPS (pH 7.5)	20	Stopped-Flow Fluorescence	Souliere et al (2013)	23940363
S. pneumoniae PreQ-II Riboswitch (Aptamer Domain, ∆P4)	PreQ	1600000	-	3.4	100 mM KCl	2 mM MgCl2	50 mM KMOPS (pH 7.5)	20	Stopped-Flow Fluorescence	Souliere et al (2013)	23940363
SAM Riboswitch (Aptamer Domain)	SAM	14300	0.002	0.14	100 mM KCl	2 mM MgCl2	50 mM KMOPS (pH 7.5)	20	Stopped-Flow Fluorescence	Haller et al (2011)	21532598
TAR RNA	Neomycin	110	0.00137	12.4	-	-	-	RT	Acoustic Wave Biosensor	Tassew and Thompson (2003)	14556896
B. anthracis TPP Riboswitch (Aptamer Domain)	TPP	150000	0.00021	0.0014	150 mM NaCl	5 mM MgCl2	10 mM HEPES (pH 7.4)	25	SPR	Chang et al. (2014)	24548121
E.coli TPP Riboswitch	TPP	81300	0.034146	0.42	100 mM KCl	2 mM MgCl2	50 mM KMOPS (pH 7.5)	25	Stopped-Flow Fluorescence	Lang et al (2007)	17693433
E.coli TPP Riboswitch (Aptamer Domain)	TPP	142000	0.04615	0.325	100 mM KCl	2 mM MgCl2	50 mM KMOPS (pH 7.5)	25	Stopped-Flow Fluorescence	Lang et al (2007)	17693433
E. coli TPP Riboswitch (Aptamer Domain)	TPP	400000	0.00036	0.00089	150 mM NaCl	5 mM MgCl2	10 mM HEPES (pH 7.4)	25	SPR	Chang et al. (2014)	24548121

## Sheet: Table S5
Supplemental Table 5. Association Rate Constants for RNA Duplex Formation
RNA	RNA	kon (M-1 s-1)	[Salt]	Temperature (oC)
A(pA)8	U(pU)8	530000	0.05 M NaCac	23.3
A(pA)10	U(pU)10	500000	0.05 M NaCac	23.3
A(pA)13	U(pU)13	610000	0.05 M NaCac	16.9
A(pA)17	U(pU)17	450000	0.05 M NaCac	23.5
A4U4	A4U4	1000000	0.1 M Na2HPO4, 0.04 M Na2H2PO4, 10-4 M Na2EDTA	21
A5U5	A5U5	2000000	0.1 M Na2HPO4, 0.04 M Na2H2PO4, 10-4 M Na2EDTA	21
A6U6	A6U6	1500000	0.25 m NaClO4, 6 mM Na2HPO4, 2 mM NaH2PO4, 1 mM EDTA	21
A7U7	A7U7	800000	0.1 m Na2HPO4, 0.04 M NaH2PO4, 10-4 M Na2EDTA	21
A7U7	A7U7	2700000	1 M NaCl + 0.01 M NaP + 10-4 M Na2EDTA	22.1
A2GCU2	A2GCU2	1500000	0.05 M NaCac	16.8
A3GCU3	A3GCU3	550000	0.05 M NaCac	16.8
A4GCU4	A4GCU4	90000	0.05 M NaCac	16.8
A6CG	CGU6	2600000	0.05 M NaCac	16.8
A8CG	CGU8	540000	0.05 M NaCac	16.8
A4G2	C2U4	11400000	0.05 M NaCac	16.8
A5G2	C2U5	3700000	0.05 M NaCac	16.8
A4G3	C3U4	2500000	0.05 M NaCac	16.8
A5G3	C3U5	1900000	0.05 M NaCac	16.8
A2GCU2	A2GCU2	8700000	0.06 M NaCac, 1 M Na+	17
A4GCU4	A4GCU4	1000000	0.06 M NaCac, 1 M Na+	17
CA5G	CU5G	6400000	1 M NaCl, 0.01 M NaP, 10-4 M Na2EDTA	12
GGGC	GCCC	5380000	0.1 M NaP	21.5
poly(A)	poly(U)	900000	~0.4 M Na+	30
poly(G)	poly(C )	300000	~0.4 M Na+	60
RNA
N = 24
Average kon = 2.4 x 106 M-1 s-1
Median kon = 1.3 x 106 M-1 s-1
Data from: Turner D, Sugimoto N, Freier S. Nucleic Acids, Springer Verlag Thermodynamics and kinetics of base-pairing and of DNA and RNA self-assembly and helix coil transition. 1990. pp. 201–227.

## Sheet: Table of Abbreviations
Table of Abbreviations
2AP	2-Aminopurine
4-DABCYL	4-((4-(dimethylamino)phenyl)azo)benzoic Acid
6-FAM	6-Carboxyfluorescein
c-di-GMP	Bis-(3'-5')-cyclic dimeric guanosine monophosphate
CoA	Coenzyme A
DFHBI	(5Z)-5-[(3,5-Difluoro-4-hydroxyphenyl)methylene]-3,5-dihydro-2,3-dimethyl- 4H-Imidazol-4-one, (Z)-4-(3,5-Difluoro-4-hydroxybenzylidene)-1,2-dimethyl-1H-imidazol-5(4H)-one
DNP	2,4-dinitrophenol
dsRNA	double-stranded RNA
EDTA	Ethylenediaminetetraacetic acid
EPPS	4-(2-Hydroxyethyl)-1-piperazinepropanesulfonic acid
FMN	Flavin mononucleotide
FRET	Fluorescence resonance energy transfer
GTP	Guanosine triphosphate
HEPES	4-(2-hydroxyethyl)-1-piperazineethanesulfonic acid)
HyCbl	Hydroxocobalamin
ITC	Isothermal titration calorimetry
KMOPS	Potassium (3-(N-morpholino)propanesulfonic acid)
KP	Potassium phosphate
MES	2-Ethanesulfonic acid
MOPS	(3-(N-morpholino)propanesulfonic acid)
NaCac	Sodium cacodylate
NAD	Nicotinamide adenine dinucleotide, oxidized
NADH	Nicotinamide adenine dinucleotide, reduced
NaP	Sodium phosphate
NMR	Nuclear magnetic resonance
OAc	Acetate
PIPES	Piperazine-N,N′-bis(2-ethanesulfonic acid)
PreQ	Pre-queuosine
RT	Room temperature (20 - 22 °C)
SAH	S-Adenosyl-L-homocysteine
SAM	S-Adenosyl methionine
smFRET	single-molecule fluorescence resonance energy transfer
SPR	Surface plasmon resonance
ssRNA	single-stranded RNA
TPP	Thiamine pyrophosphate
Tris	Tris(hydroxymethyl)aminomethane
